# Supplementary material for: Implications for prediction and hazard assessment from the 2004 Parkfield earthquake
Source: Springer Nature journal article supplement (doi:10.1038/nature04067), 2005-10-01
Supplement: 41586_2005_BFnature04067_MOESM2_ESM.pdf [file 41586_2005_BFnature04067_MOESM2_ESM.pdf]

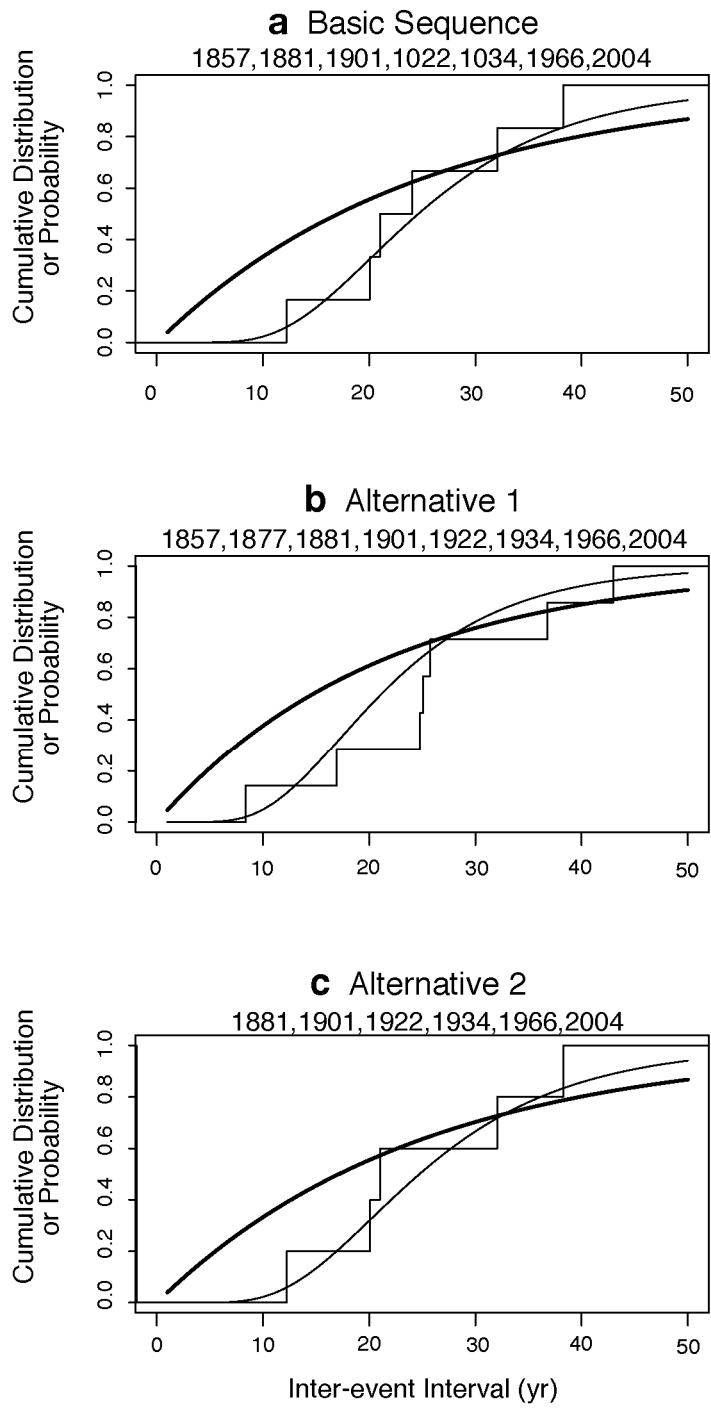

Figure S2 - Bakun - #2005-01-01093
